# Supplementary material
Source: Elsevier journal article supplement (https://www.sciencedirect.com/science/article/pii/S2238785419302571)
Supplement: mmc1 [file S2238785419302571:mmc1.docx]

**Supplementary Material for:**

**A new collector scheme for strengthening ilmenite floatability within acidic region**

Jihua Zhai a, d, Xiaolong Lu a, Pan Chen a, b, c, *, Changping Guan a, Wei Sun a, b, Wei Chenc, *

a School of Minerals Processing and Bioengineering, Central South University, Changsha 410083, China

b Key Laboratory of Hunan Province for Clean and Efficient Utilization of Strategic Calcium-Containing Mineral Resources, Central South University, Changsha 410083, China

c Hunan Research Institute for Nonferrous Metals, Changsha 410100, China

d School of Civil Engineering, University of Leeds, Leeds LS2 9JT, UK

Figure. S1. XRD pattern of pure ilmenite samples.

Figure. S2. XRD pattern of pure titanaugite samples.
